# Supplementary material for: Targeted long-read sequencing as a single assay improves diagnosis of spastic-ataxia disorders
Source: bioRxiv or medRxiv preprint supplement (doi:10.1101/2024.09.04.24312938), 2024-09-06
Supplement: Supplementary file [file media-1.pdf]

**A** Targeted LRS coverage depth - by participant

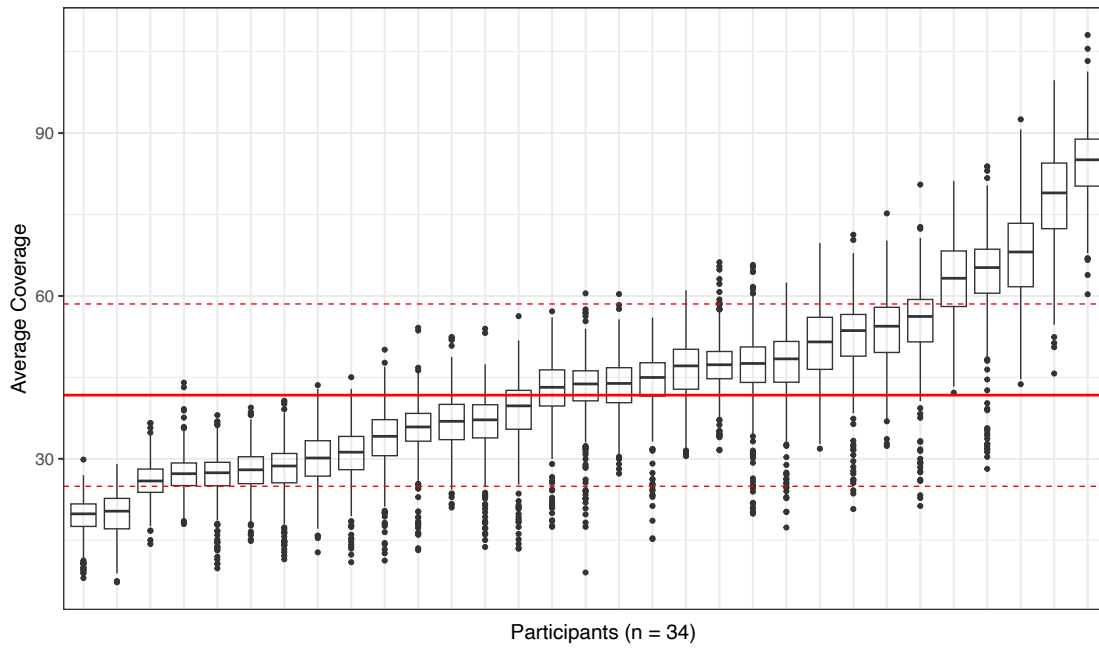

**B** Targeted LRS coverage depth - by target

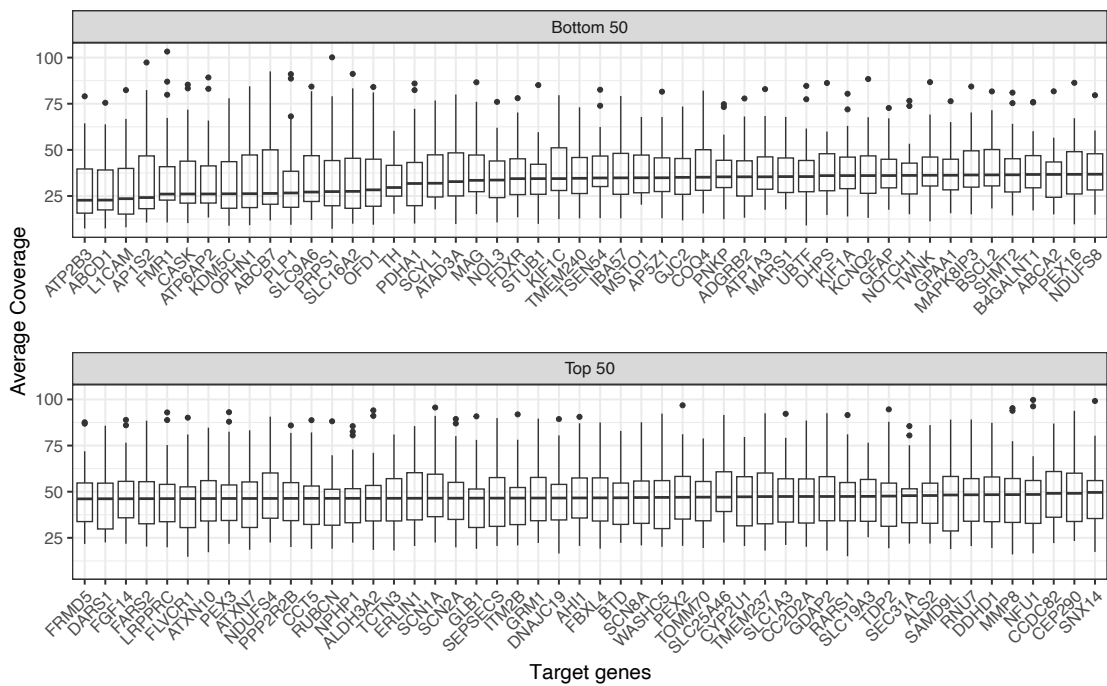

**Supplementary Figure 1. Sequencing coverage metrics for targeted long-read sequencing assay.**

(A) Average coverage depth for gene targets (n = 469) obtained for each participant in our undiagnosed spastic-ataxia cohort (n = 34 individuals). (B) Average coverage depth for participants (n = 34) obtained for each gene target on our targeted long-read sequencing panel; given space constraints, only the fifty genes with lowest and highest coverage are shown.
