# Supplementary material for: Targeted long-read sequencing as a single assay improves diagnosis of spastic-ataxia disorders
Source: bioRxiv or medRxiv preprint supplement (doi:10.1101/2024.09.04.24312938), 2024-09-06
Supplement: Supplementary file [file media-2.pdf]

## A Summary of known pathogenic variants in control cases

| Participant | Diagnosis | Gene         | Variant(s)                                  | Original testing method    | ONT LRS Result                                                                                                     |
|-------------|-----------|--------------|---------------------------------------------|----------------------------|--------------------------------------------------------------------------------------------------------------------|
| 35          | FXTAS     | <i>FMR1</i>  | (CCG) <sub>85</sub>                         | PCR and triplet-primed PCR | (CGG) <sub>n</sub> (AGG) <sub>1</sub> (CGG) <sub>n</sub> (AGG) <sub>1</sub> (CGG) <sub>67</sub>                    |
| 39          | SCA3      | <i>ATXN3</i> | (CAG) <sub>73</sub>                         | PCR and fragment analysis  | (CAG) <sub>2</sub> (CAA) <sub>1</sub> (AAG) <sub>1</sub> (CAG) <sub>1</sub> (CAA) <sub>1</sub> (CAG) <sub>71</sub> |
| 36          | SPG7      | <i>SPG7</i>  | c.1529C>T (p.Ala510Val) presumed homozygous | Targeted NGS panel         | c.1529C>T in homozygosity                                                                                          |
| 37          | SCAR10    | <i>ANO10</i> | c.132dup (p.Asp45Argfs*9);                  | Targeted NGS panel         | c.132dup (p.Asp45Argfs*9) ; c.1219-1G>T <i>in trans</i>                                                            |
| 38          | SCAR23    | <i>TDP2</i>  | c.425+1G>A; c.728del (p.Met243Argfs*3)      | WGS                        | c.425+1G>A ; c.728del (p.Met243Argfs*3) <i>in trans</i>                                                            |

## B Identification of STR expansions in control cases

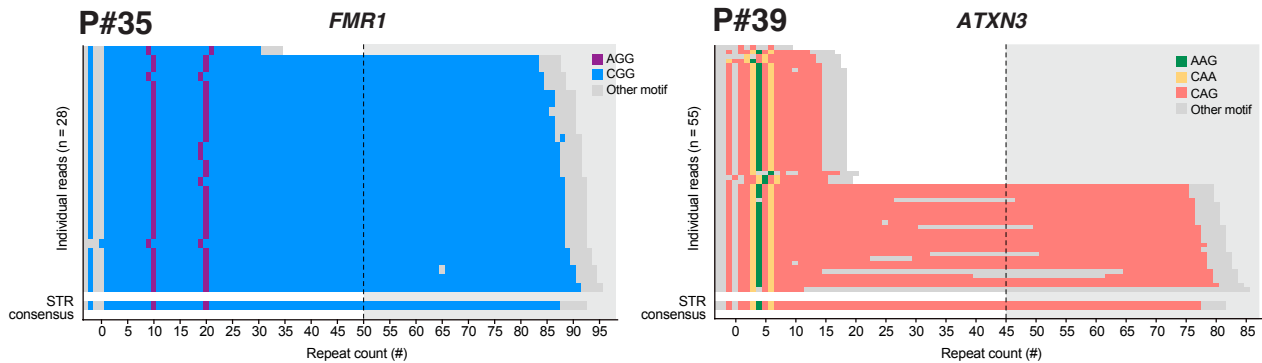

## C Detection and phasing of sequence variants in control cases

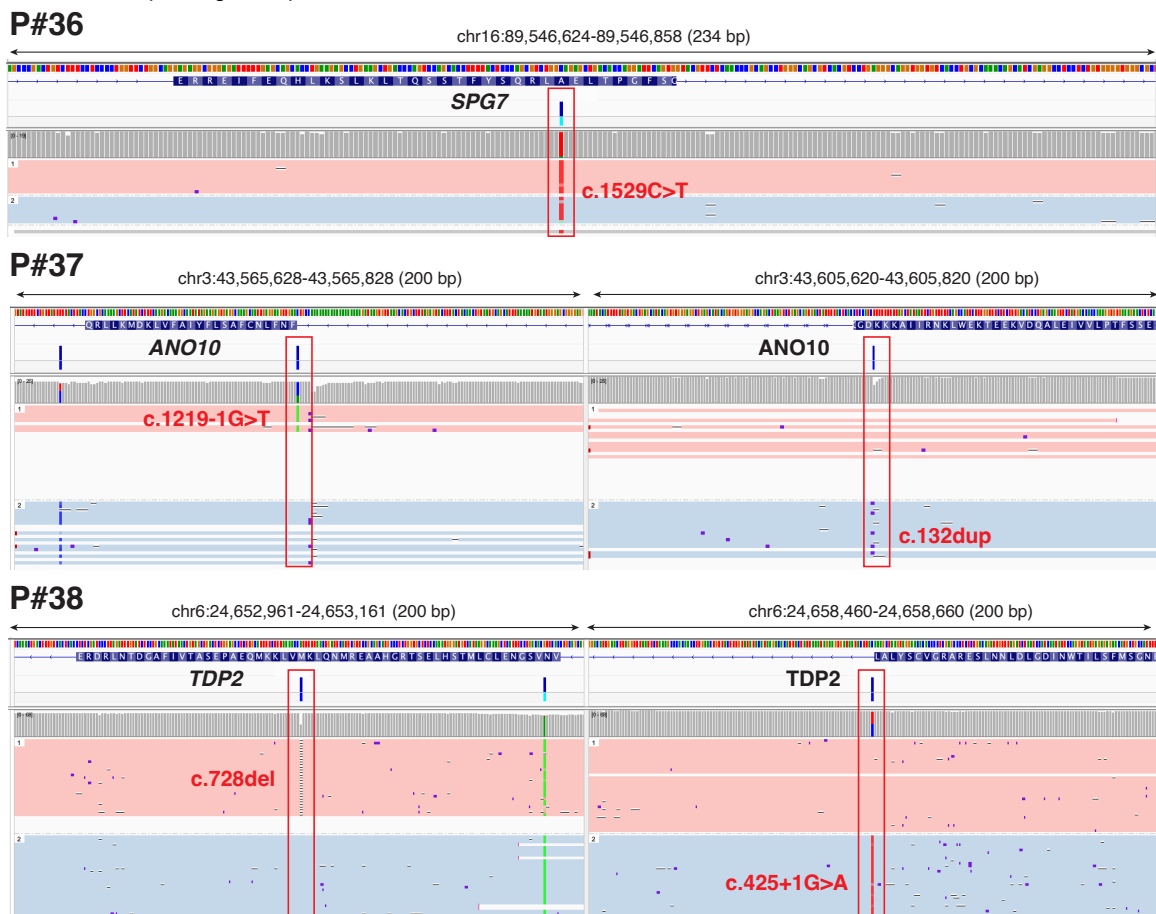

### Supplementary Figure 2. Accuracy of targeted long-read sequencing confirmed by analysis of positive control cases.

(A) Table provides an overview of analysis results for five spastic-ataxia patients with known genetic diagnoses who were included as positive controls. Glossary: FXTAS, fragile X tremor/ataxia syndrome; NGS, next generation sequencing; ONT LRS, Oxford Nanopore Technologies long-read sequencing; PCR, polymerase chain reaction; SCA, spinocerebellar ataxia; SCAR, spinocerebellar ataxia, recessive; SPG, spastic paraplegia; WGS, whole genome sequencing. (B) Sequence-bar plots show STR genotyping results for *FMR1* (Patient #35; FXTAS) and *ATXN3* (Patient #39; SCA3). Each individual long-read alignment is shown separately and a consensus sequence for the expanded allele in each case is shown below (note: only one allele is present for Patient #35, as *FMR1* is on chrX and the individual is male). (C) Genome browser view shows detection of known pathogenic sequence variants within *SPG7* (Patient #36), *ANO10* (Patient #37) and *TDP2* (Patient #38). Alignments are phased into separate haplotypes (pink = haplotype 1; blue = haplotype 2), confirming the pathogenic variants for #37 and #38 are on alternative haplotypes (i.e. in trans).
