# Supplementary material for: Targeted long-read sequencing as a single assay improves diagnosis of spastic-ataxia disorders
Source: bioRxiv or medRxiv preprint supplement (doi:10.1101/2024.09.04.24312938), 2024-09-06
Supplement: Supplementary file [file media-3.pdf]

Detection and phasing of pathogenic sequence variants in four undiagnosed participants

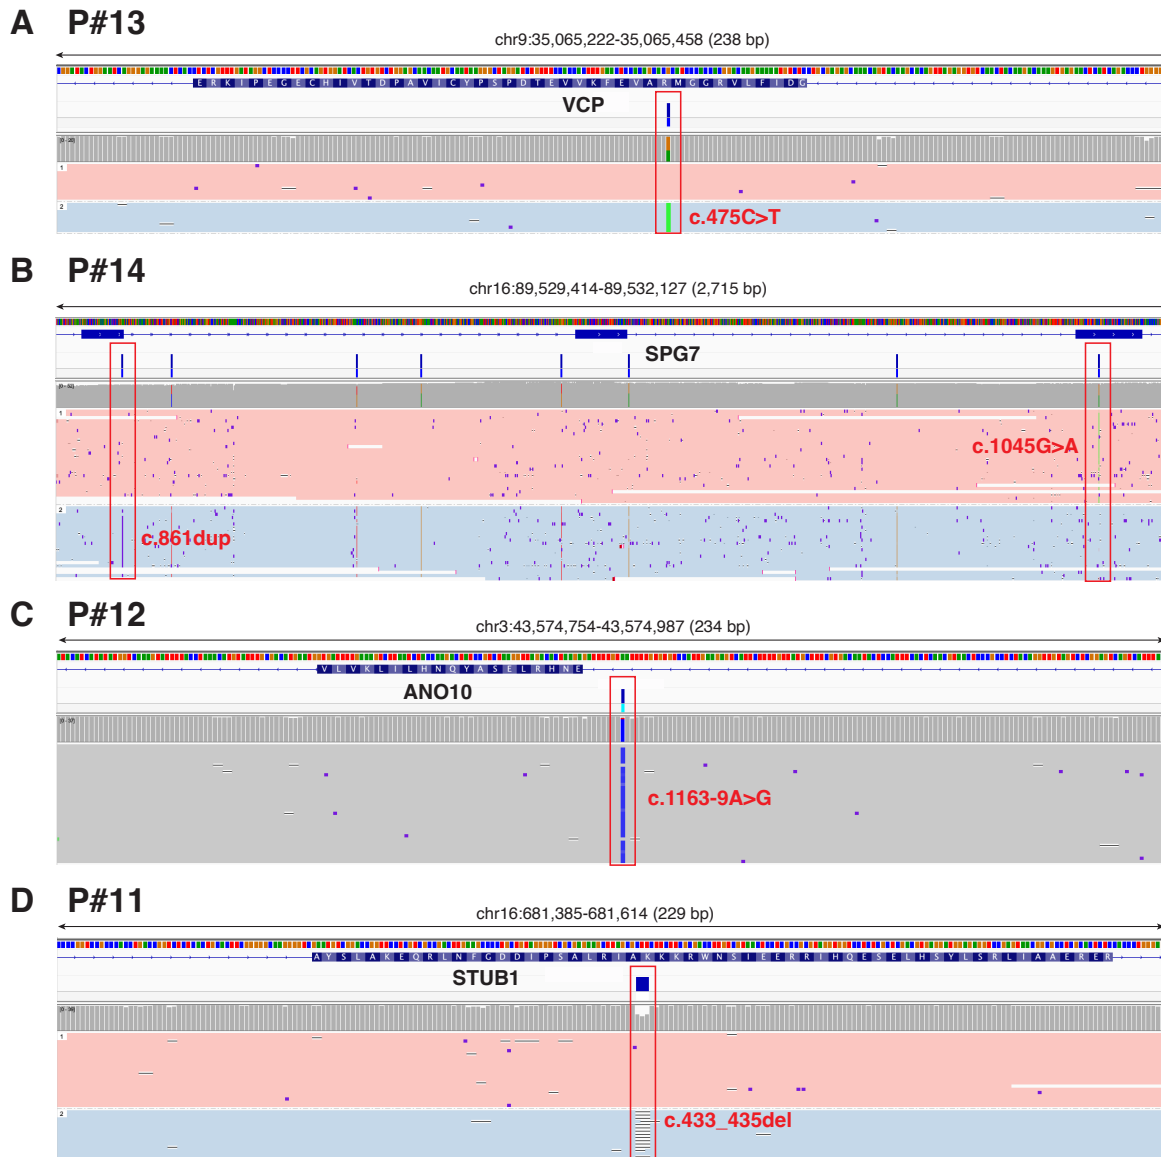

**Supplementary Figure 3. Detection and phasing of pathogenic sequence variants in four undiagnosed participants.**

Genome browser view shows detection of pathogenic sequence variants within (A) VCP (Patient #13); (B) SPG7 (Patient #14); (C) ANO10 (Patient #12) and (D) STUB1 (Patient #11). Alignments are phased into separate haplotypes (pink = haplotype 1; blue = haplotype 2).
